# Supplementary material for: Ab initio detection of multiple epitranscriptomic modifications from ONT direct RNA sequencing data
Source: Research Square preprint supplement (doi:10.21203/rs.3.rs-6343479/v1), 2025-04-21

## Supplementary Figures

**Supplementary Figure 1.** Example of a multi-modification (m6A+I) NanoSpeech FASTA file output. Header lines containing positional information for multi-modification basecalling are highlighted in red. If detected, modification indices are stored as lists according to the following pattern: [alternative\_modified\_base\_symbol]\_[canonical\_base\_symbol]=INDEX1, INDEX2, ..., INDEXn (e.g., M\_A for m6A and I\_A for Inosine in this example). Modified bases (in blue) are replaced by canonical versions to facilitate downstream mapping procedures.

A NanoSpeech accessory script (see Data Availability) enables the indexing of header lines, allowing random access to modified bases. Additionally, it retrieves per-read mapping coordinates for each modification, aggregating modification ratios in genome space.

**Supplementary Figure 2.** Analysis of NanoSpeech basecalled reads from synthetic samples. (A) Statistics of raw sequences for pureG (blue), pureI (orange), and CC (green) IVT samples showing: len – the total length of the basecalled reads; Acount – the number of basecalled As in each read, including inosines; Acount\_nol – the same count excluding Is; lcount\_norm\_len – the number of identified inosines in each read, normalized by its length; lper\_on\_As – the percentage of Is relative to the total number of As. (B) An extended scatterplot version displaying the inosine content (normalized on length) for the same samples. (C) The inosine content of IVTs from A549 cells and two replicates of HeLa cell lines (blue, orange, and green, respectively). Reads were basecalled using the NanoSpeech model trained on multiple species for enhanced generalization capacity.

**Supplementary Figure 3.** Alignment screenshot of NanoSpeech and Guppy basecalled reads from pureG and pureI samples based on a subset of 100 IVT reads. Alignment profiles were strongly improved in modified synthetic sequences.

**Supplementary Figure 4.** The percentage of NanoSpeech (blue) and Guppy (red) aligned reads from different samples including synthetic (pureG, pureI, CC, coli-IVT-mod and coli-IVT-unmod) and real (*E. coli*, *S. cerevisiae*, HEK293T - hKO, hWT, and hOE) data.

**Supplementary Figure 5.** Alignment screenshot of NanoSpeech and Guppy basecalled reads from the highly modified *E. coli* IVT sample. A random and independent subset of reads (N=1000) were mapped using minimap2 (with k=14) by NanoSpeech and Guppy. The mapping of Guppy reads did not produce alignments. On the contrary, NanoSpeech reads showed low noise and high mappability.

**Supplementary Figure 6.** Analysis of NanoSpeech basecalled reads from synthetic coli-IVT samples. (A) Statistics of raw sequences for modified (blue) and unmodified (orange) coli-IVT samples, showing: len – the total length of the basecalled reads; Acount – the number of basecalled As in each read, including inosines; Acount\_nol – the same count excluding Is; lcount\_norm\_len – the number of identified inosines in each read, normalized by its length; lper\_on\_As – the percentage of Is relative to the total number of As. (B) An extended scatterplot version displaying the inosine content (normalized on length) for the same samples. Reads were basecalled using the NanoSpeech model trained on multiple species for enhanced generalization capacity.

**Supplementary Figure 7.** Per-site detection of m6A and I in reads from IVT synthetic constructs basecalled by NanoSpeech implementing the m6A\_I model for the concomitant identification of m6A and I. The model was generated by NanoListener and included reads produced using the R9.4.1 flowcells from (A) modified and (B) unmodified CC (with or without m6As) or (C) pureI and (D) pureG

IVTs (with or without inosines). Reads were basecalled by NanoSpeech using the multi-modification model with the following extended vocabulary {A, C, G, U, I, m6A}. The modification frequencies Ifreq (inosine) and Mfreq (m6A) per site were computed by aggregating aligned reads. Ifreq is in blue, Mfreq is in red.

**Supplementary Figure 8.** Analysis of current intensity profiles of re-squiggled events by f5c eventalign on DRACH motifs in CC IVT molecules. Unmodified CC IVT reads were compared, position-wise, with their corresponding versions containing either m1A or m6A modifications to identify differences in their raw signal signatures.

**Supplementary Figure 9.** Statistical analysis of the current distributions depicted in Supplementary Figure 8. Re-squiggled current events were extracted from unmodified, m1A, and m6A-containing CC IVTs, and their distributions on representative DRACH contexts were summarized as mean, standard deviation, and sample size. Mann-Whitney U tests were used to compare the three groups pairwise, and p-values are reported in the last three columns.

**Supplementary Figure 10.** Alignment screenshot of NanoSpeech (red) and Guppy (blue) basecalled reads from a subset of unmodified and modified (with pU) sequences of the CC IVT samples. Alignment profiles were strongly improved in modified sequences.

**Supplementary Figure 11.** Correlation between the length of electric signal chunks and the corresponding output kmers. The “Simulated Randomers Strategy,” implemented by NanoListener, was tested using different combinations of parameters to define the expected ranges of raw signal chunk lengths to extract and annotate with nucleotide sequences. In (A), for the general multi-species dataset, the correlation between extracted chunks and output kmers is shown, with a Spearman’s correlation coefficient of  $\rho = 0.794$ ,  $p < 10^{-15}$  ( $N = 50,000$ ). In (B), for the R9 unmodified curlcakes dataset, two sets of chunks with variable lengths (1) from 900 to 1500 and (2) from 1300 to 1900 current measurements, were produced. When merged, these two datasets showed a positive Spearman’s correlation between electric signals and output kmers, with  $\rho = 0.374$ ,  $p < 10^{-15}$  ( $N = 100,000$  chunks). In (C), the same analysis was performed on NanoListener datasets of chunk/output-kmer pairs generated using data from unmodified curlcakes sequenced with the RNA004 kit. In this case, the evaluated chunk length ranges were (1) 800–1300, (2) 1100–1700, (3) 1500–2100, (4) 1900–2500, and (5) 2500–3200 samples. The correlation was even stronger in this global dataset, with  $\rho = 0.841$ ,  $p < 10^{-15}$  ( $N = 250,000$  chunks). In (D) and (E), the learning curves for training on CCs and pureI/pureG datasets using shorter and longer chunk strategies, respectively, are shown. In (F), the learning curves for five parallel training sessions on an RNA004 CCs mini-dataset using different NanoListener configurations are displayed. In (G), the validation losses for the same dataset are shown.

Supplementary Figure 1

>77128b6d-c6da-486c-a44d-8fa5cab03597 I\_A=2452,2461,2470,2479,2489,2498,2504,2513,2522

M\_A=0,12,15,18,22,28,30,35,36,42,44,45,46,51,54,59,63,64,70,74,87,88,92,93,102,110,114,124,130,132,133,142,171,172,181,184,192,199,204,205,206,207,210,218,223,240,241,245,257,264,266,267,269,274,280,282,284,285,287,293,298,299,301,303,308,314,316,318,319,321,327,328,334,338,347,348,353,357,358,359,368,369,374,376,378,379,389,398,399,405,414,419,420,422,430,435,439,442,443,446,447,453,454,455,456,459,461,472,477,478,488,489,492,493,494,498,501,505,509,517,519,520,522,526,528,537,539,545,551,552,553,555,556,557,559,562,566,567,568,575,577,585,587,589,651,653,656,659,661,662,663,664,665,666,679,685,692,696,698,710,719,724,727,739,741,752,756,762,768,769,776,784,793,806,810,812,816,821,829,834,835,836,837,840,841,842,843,844,846,847,851,854,857,864,871,877,881,887,893,897,901,913,914,916,925,933,936,939,944,949,951,952,954,961,965,971,983,984,985,986,989,993,995,997,1003,1005,1006,1011,1043,1045,1048,1051,1054,1055,1057,1058,1059,1075,1076,1081,1082,1084,1085,1102,1106,1111,1118,1122,1126,1136,1137,1139,1140,1151,1154,1158,1168,1170,1175,1182,1183,1184,1187,1197,1201,1207,1209,1210,1215,1216,1217,1219,1226,1230,1233,1236,1238,1240,1241,1245,1246,1250,1276,1289,1309,1313,1319,1324,1328,1329,1334,1339,1342,1345,1349,1353,1355,1366,1377,1382,1385,1390,1394,1407,1413,1414,1415,1421,1427,1428,1431,1432,1436,1449,1450,1454,1456,1465,1466,1469,1475,1480,1481,1483,1485,1486,1490,1495,1497,1499,1501,1505,1509,1511,1513,1515,1516,1517,1519,1528,1541,1542,1549,1552,1554,1560,1564,1569,1582,1585,1588,1595,1598,1601,1609,1612,1613,1620,1625,1631,1635,1641,1643,1644,1655,1656,1663,1664,1666,1669,1676,1678,1696,1709,1719,1726,1732,1734,1739,1749,1752,1753,1755,1764,1765,1768,1770,1772,1785,1787,1789,1808,1818,1819,1822,1826,1829,1835,1836,1838,1845,1846,1848,1850,1852,1853,1855,1859,1861,1866,1867,1868,1893,1911,1913,1914,1923,2017,2019,2020,2021,2024,2025,2026,2029,2036,2046,2051,2052,2053,2068,2078,2079,2082,2088,2089,2104,2108,2112,2113,2116,2118,2121,2131,2134,2135,2150,2152,2155,2159,2161,2163,2164,2166,2168,2173,2176,2177,2178,2182,2185,2190,2193,2194,2206,2207,2213,2216,2217,2219,2220,2222,2228,2233,2236,2238,2243,2244,2246,2248,2249,2252,2253,2257,2268,2270,2277,2279,2290,2291,2292,2297,2301,2305,2311,2315,2319,2324,2325,2328,2330,2345,2346,2348,2351,2353,2357,2358,2370,2371,2373,2376,2378,2382,2383,2528,2531,2532,2533

AGGGCTCTCGGCAGGATCACTTATTCTGAGACGCGAAGTTCCATAAATTTTAGGATTGACGCAATTGGTACGCACGGGGGGTTTTGAATGTAAGTGTCCGACTGGTGGAGTGAGTTGGCGTCA GTCGACAAGGGCGCGGACCTTTTTGTTTCCTTTTTTGTTTCCTTTAACGGCGTCTACTATGGCGTGACCCCTTAGCCTAAAACCATGCGCCCATGTCAGCGCTCTTGTGTGGGCAACGGACGCCCG CCTCTACGCCTTACAACAGTTCAGCCGTACATAACAGCTGGACCTTAACACAGTTCAGCCGTACATAACAGCTGGAACGGGTACCTATCCTGTGCAAGCGCATTGAACTTGGTCGAAGTTTCAAGATA ACCCCGTGGCAGTGCCGGGAATGGCGACTGCGCGCACCTCAACATTGTTGTACTGCACGTACCAATGAACCGTGAAAAGTACAGTCCTGGGTACACCCCAACGCTTTTGTAAGGAAACCGACCACG GATCGAGTTCTTGATAATACTGACATGTGTTCTAGAGGTGTATCTTCAAAGAAAGACCATCCAAATGTGGCACACTGTTCCATAGAGTACTCCGCGGGATCTGGACCCTACATGGATGTGACTTC CTAGCGCGTGTCCAGGCGGGTTAGAGCATTAGAAAAAACTCGTGCGGGCGATTTGCAGTTTGCAGTCACATCTGCTTGGTTATTCGGCGCAGTTTACCACGGTTCTGCGGATAGTCGGTTGCCATCTA TCGTCACTCTCCAAGGCCCGATTGCGGCATTTCGTCCCATTTGGGCGTTGGATGGAGACCCATCGCATGGCTGCAGCTTAAAATTAAAAACAACGGAGGATGATGCCGTAGGCTGTAGCGCGAGCGA TCGTGATCGCTACCGATCCAGGGTTTCTCCTAATAGTGCTTGGATTCTGCTAGTAGTAGCGTAGCGGATAATATGCGGCAGGCACGTGCAGCGTGGGCGTGAAAATCATCGAGAGAGTTCCATAAT TTTAGTTGGGACGTTGACTCCAGCTTATGAGAGGAATATTAGTAGCAATAAAGCGCGGGCGCGGGCAACCGGAACAAGGCCTGCCGTGGTCTGATCGAGTCCAGGGGGTACGGACTGAGTGCG GGTAAAGAACTGTGCTCTTACCACGTATCTCCTCCTAGATCCTATTTTGTAATTAGTTTGCCTACGGACCCTTACAACCTGAAAGAGGTGTTAGGGATTATGAGATAATCGAACTGATCTCGGGTG GTCCGGGCGTCCCGCTAGCCCGGTTTCGTACCGGGTTTGAAATTTGTTGACTTATGTCCATTGTATTCAACGGTATCCCACTACGACGTAGCGACATCTGTTTGGTATGGGTTTGGTATGGCATCAC TTGATCCAGCTGGTTCTGTGACTCCGAAATGTTGACTGGGAATGAATGGAGGTTTGTCTGCGAACCAGATGGCTTGCAAGCACGCGCAGCCGAAGACAATGTACCGTAGACAGACTGACGCACA CACAAAGATTTTGCTCACTCGTGGCTTTGAATTCGCGAGGACAGCGGGACGGAGGCAGCGGGCCCTGTGACGACGAGCTGCGACGACGAGCTGCCGACTAAGGGCTCACTTTACTTTCAGGGA CTCCGATAATGGTTCCCTTAAGCGTCTAAGAGTAGCCCGTACAGTCTGCGCCCTTGCTCCACTTGGTTTCTGGATGCCCTTTACGCGGGACGTCCAGATGCCACTCGGGGTGACGAAGAGTTTG GCGAATGACATACGTCTCGTTCTGACATAGCGTCGCTCGCTTGCTCAGTGCTGCTGAAGGACCTACCACCCTCAAGATCTCCTAATACACAAGACTCAGAGCGCAAAGGTCCGGTTGCTGCTCCC CCTTTCACCCGGTCCCCTCGTGGCATAAGGTTGTCGACCGCCCTTGTTTAATAATGGTCGCCACGTGAGCTTCTACCTTCCCAGAATGGGCTAACCCTAGCTGATACATCGCTGGGAGCGGGC TGCCGAGAACTAAATCAGGGTTCATGGTGTCCGATTTGAAATCCGTGCTCCCCTTAGCCTGCGGGAAACGACCCGTAATGGCCGTTCTGGGGAGTTAGTTAACCAGACCAGCCGTTTCGCACTAAT TGC TCGCCGTTGACATTATGCAGAGAACAGAGCGCAGGAAAGGCAGTACGCCAGGAATTGCGCCC GTCAACTTTGAGCAATAATATGCCTACCTTATTATAGTCTAACAGAAAGTAACCTAGCGTGG TGGCAGACGGCCGATAGGCGGCCTGTAAAGGCCATGGAGGCAGGTGTACCCATCTACGGGAAGTATACGTTTTCTGTGGGGAATATCACATGGAATTTCTGTGGGGAATATCACATGGAACGTGT ACGTCACCAGGTATAGATTAGCTAGAAGCCTTTCAGCAACAAGAGCCATGGACTGTCCCTCAACAACACCTATATATCCCATCATTTCCACCTTCTCACATCATTTCTCATCCATATAACTCTAAAC CTTTAACCAAATCAAAGTATGTA

Supplementary Figure 2

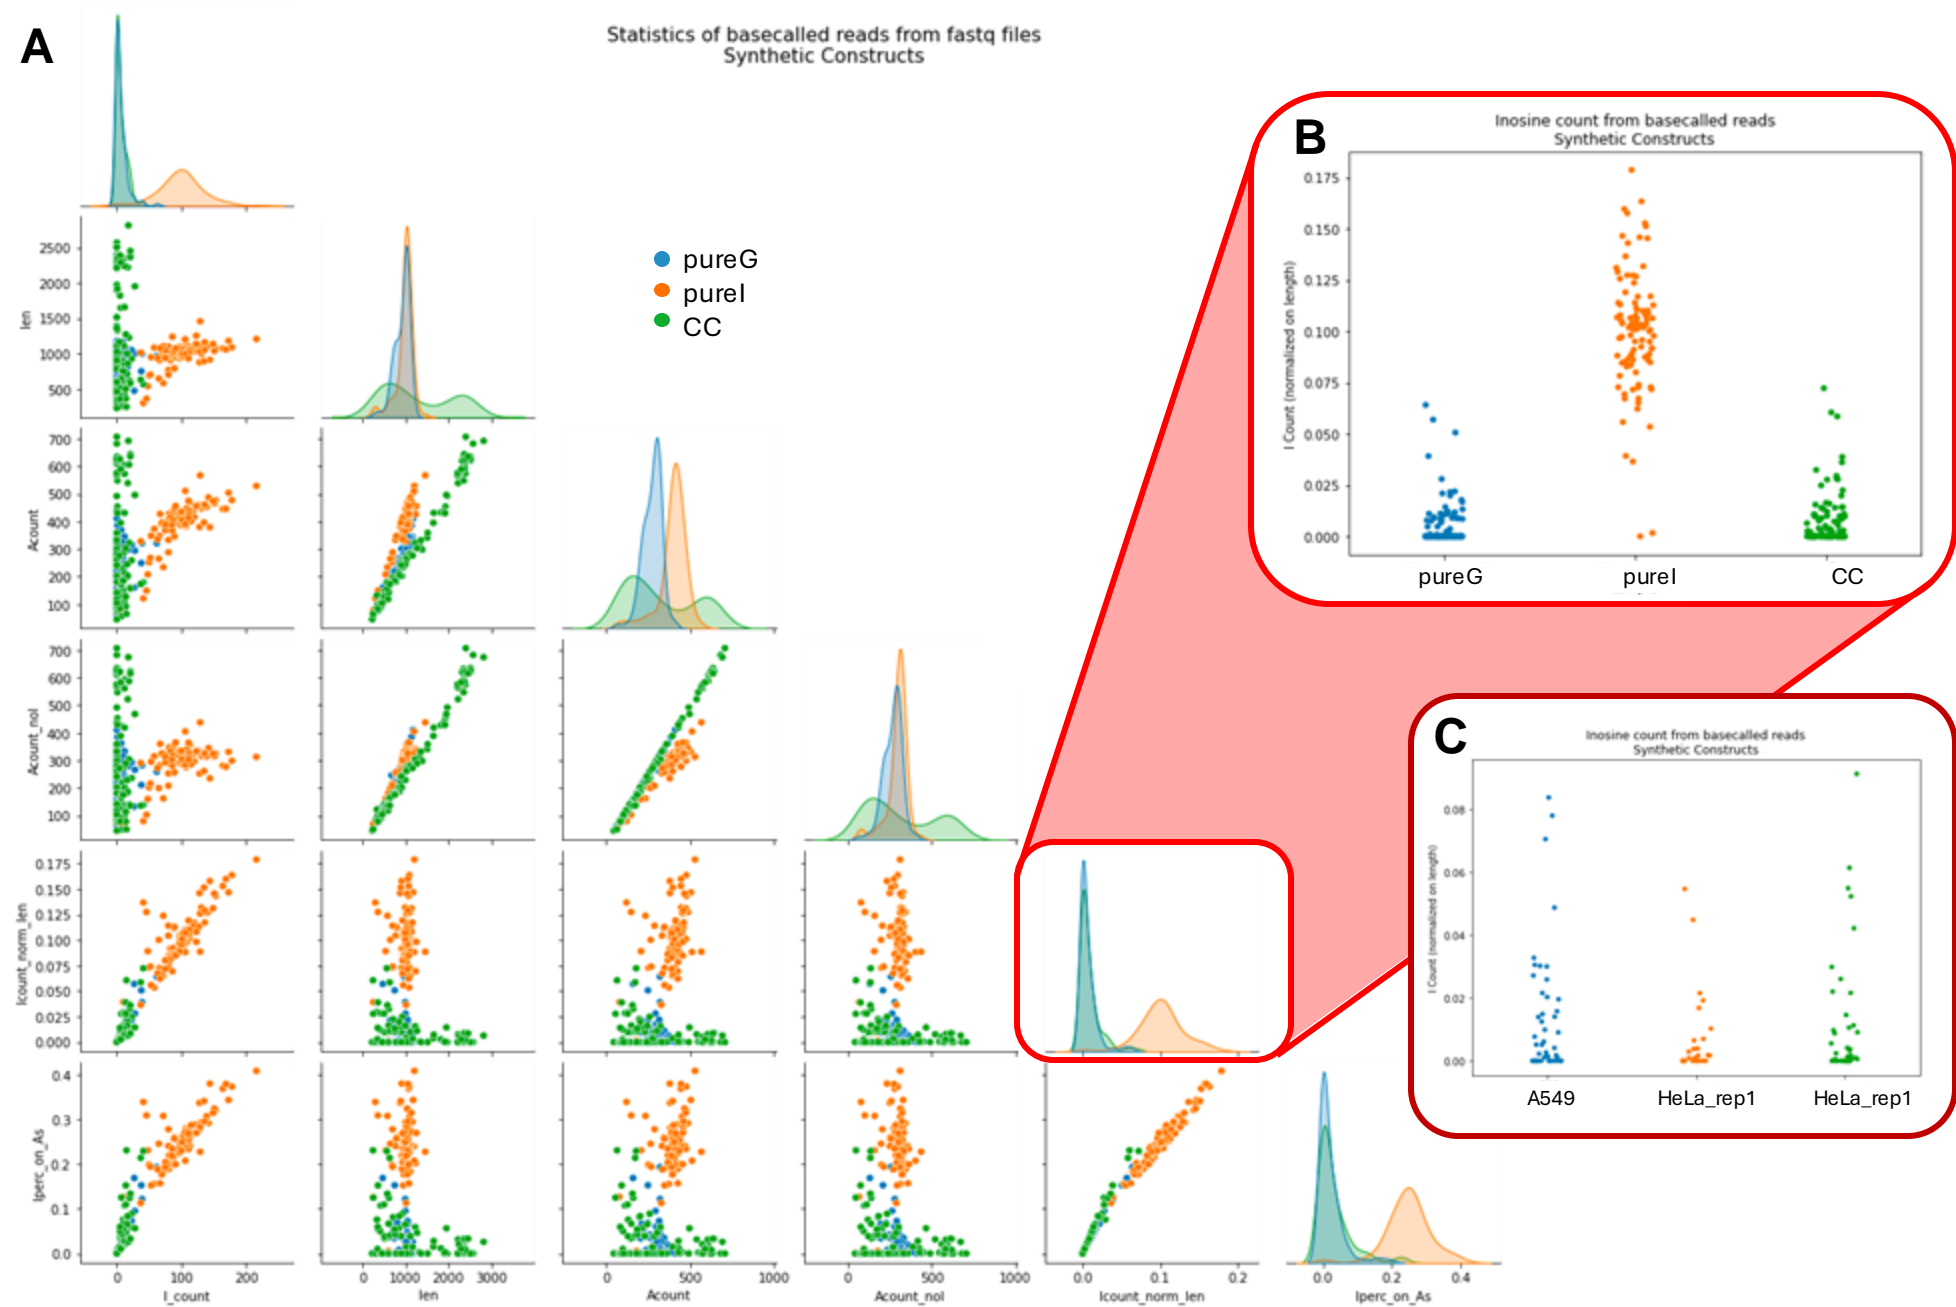

Supplementary Figure 3

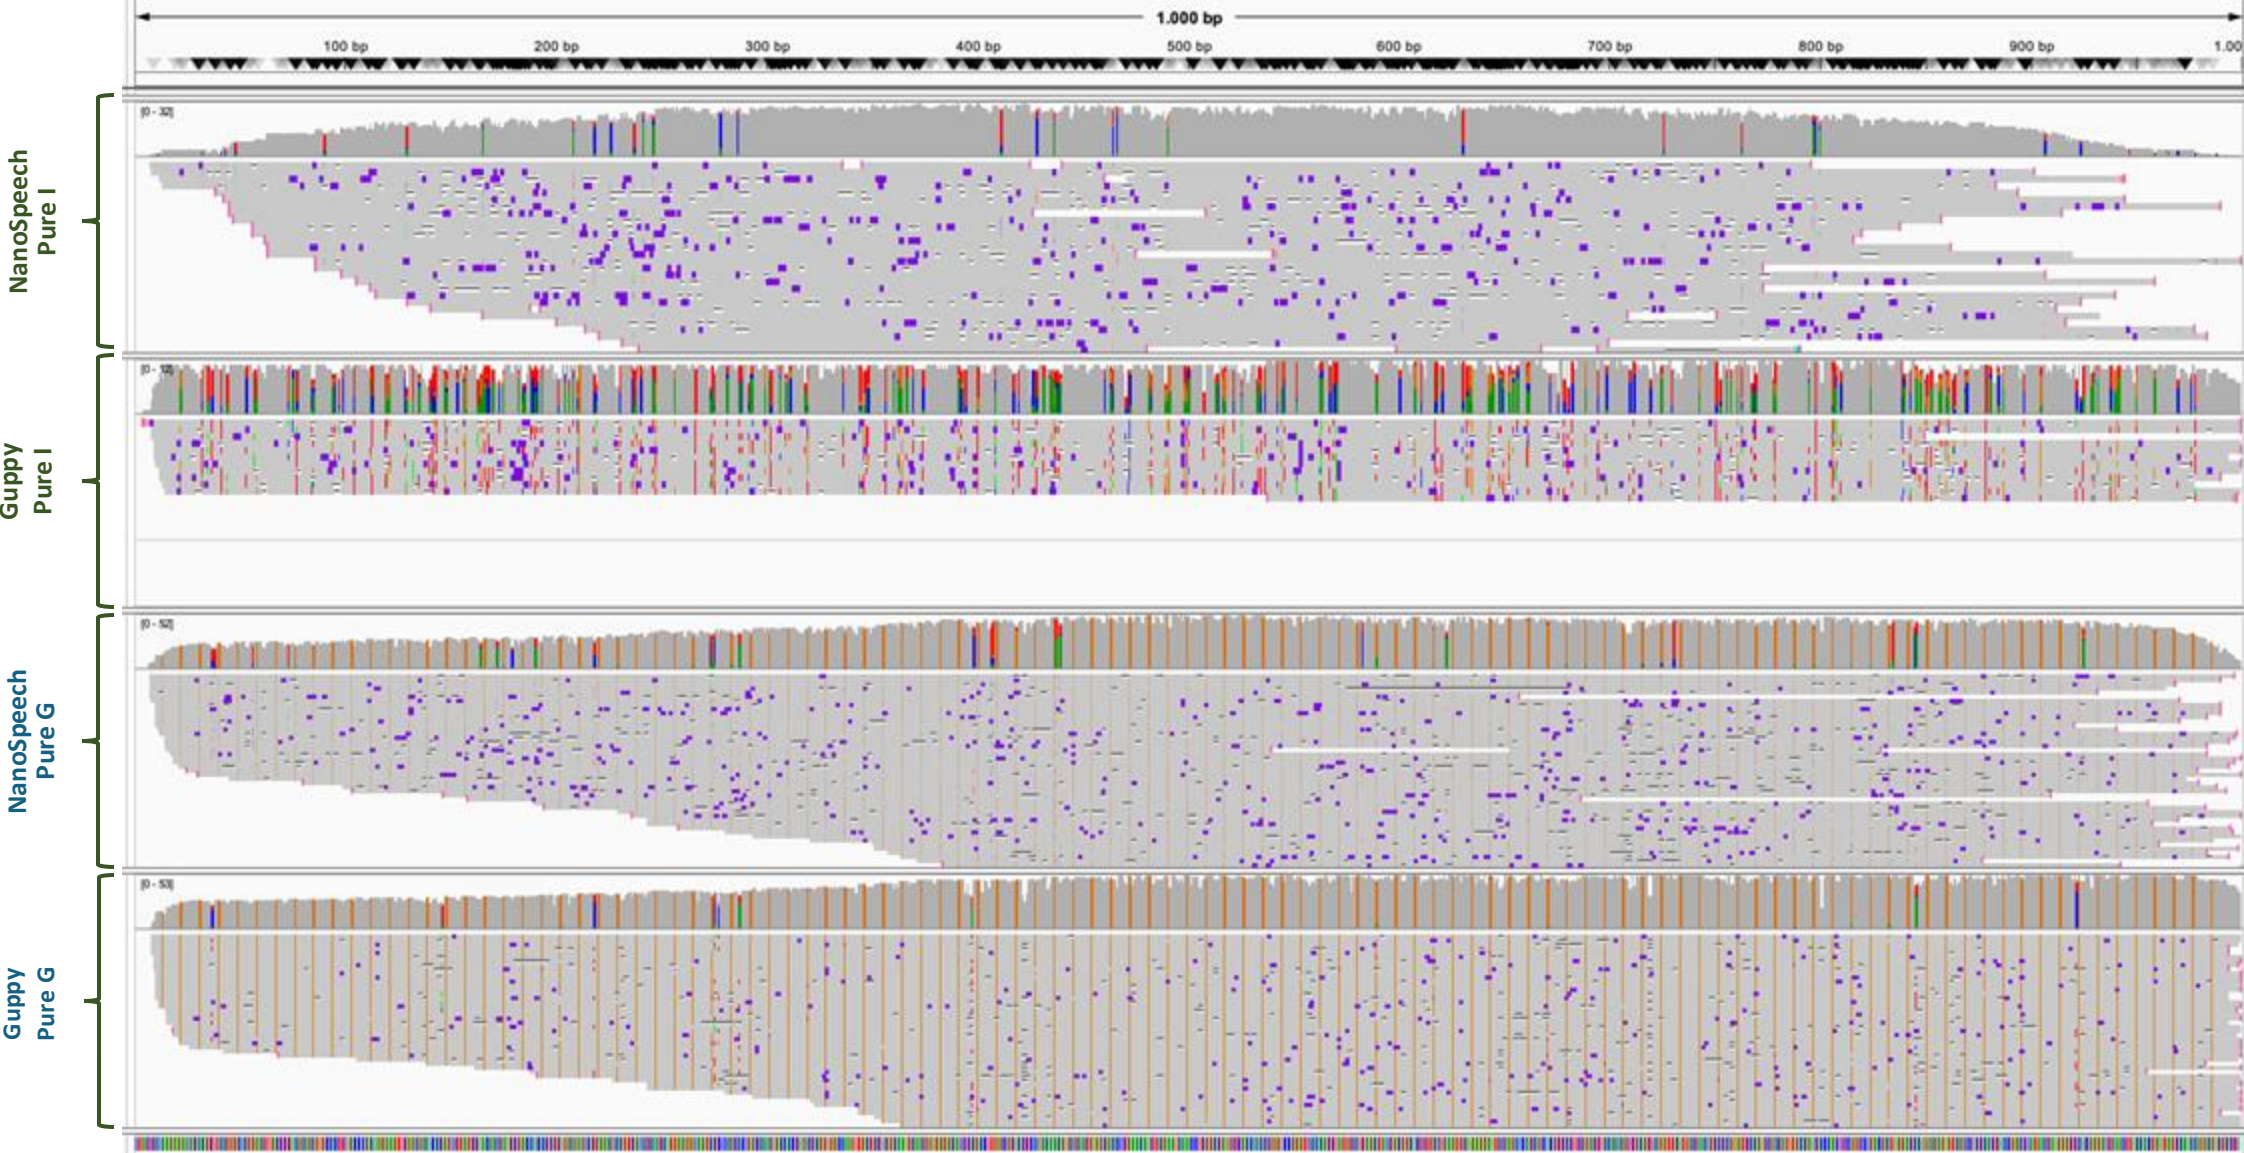

Supplementary Figure 4

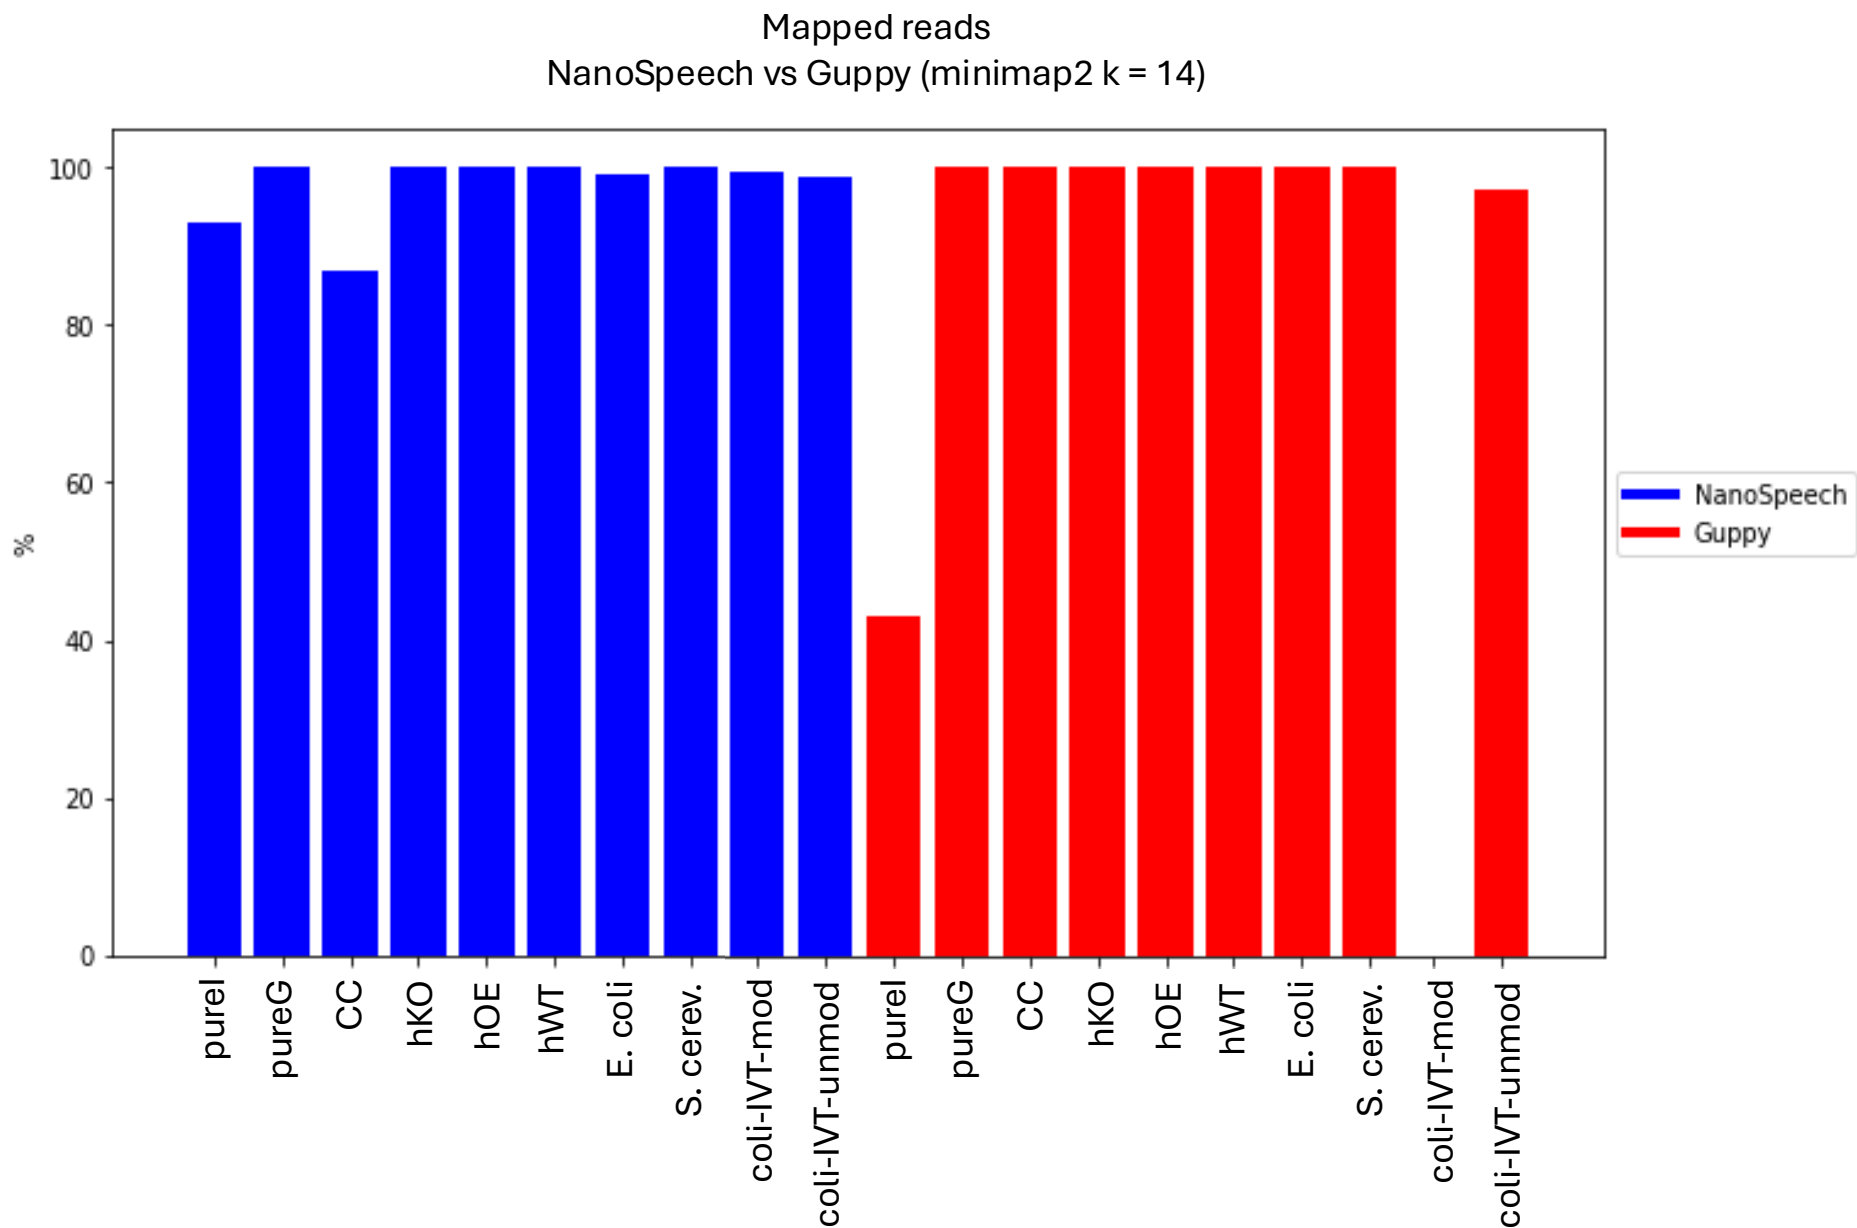

Supplementary Figure 5

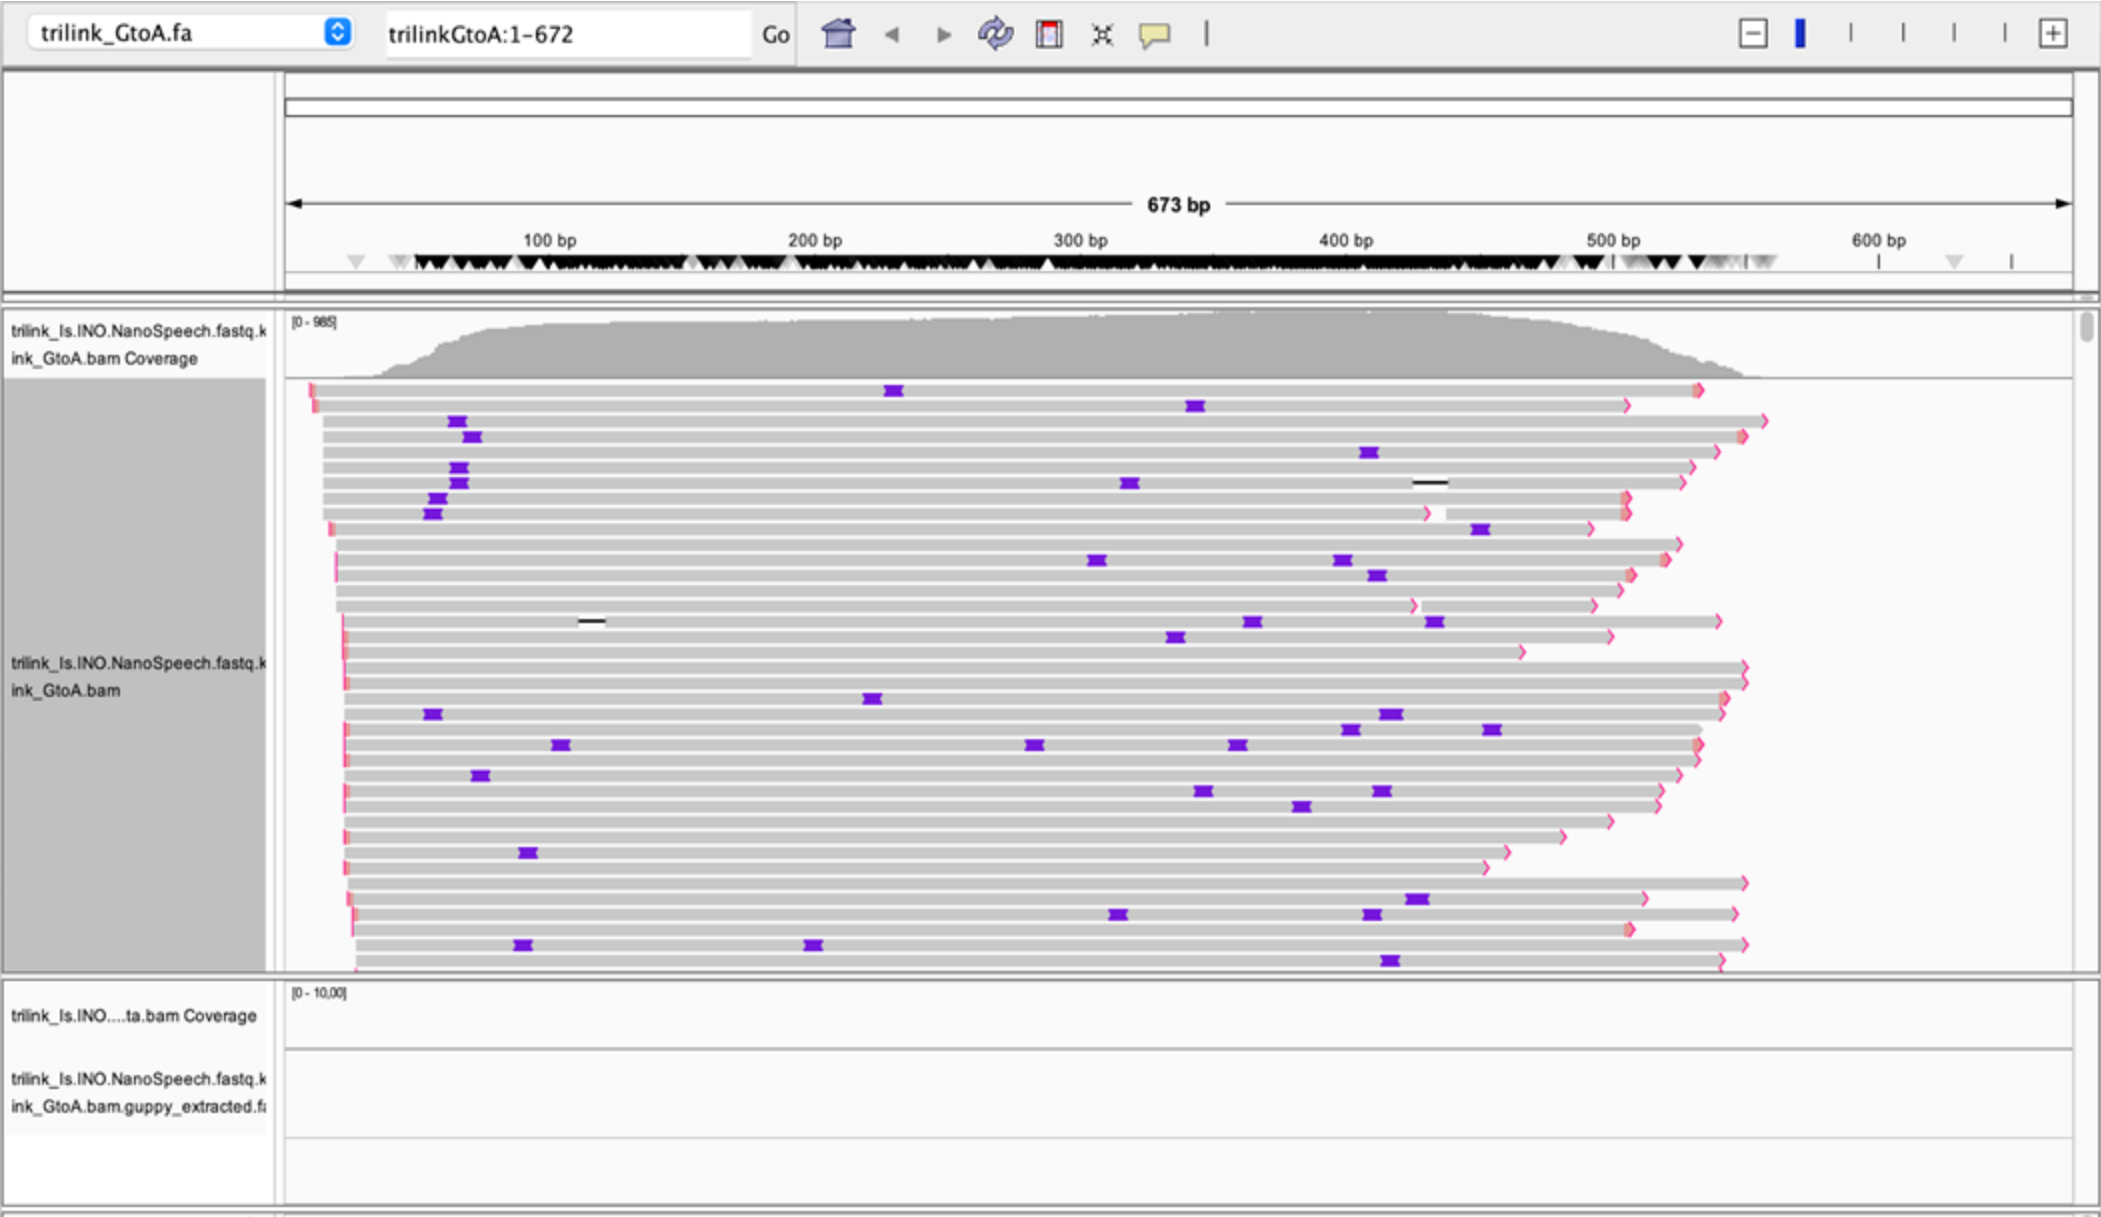

Supplementary Figure 6

A

Statistics of basecalled reads from fastq files  
Synthetic Constructs coli-IVTs

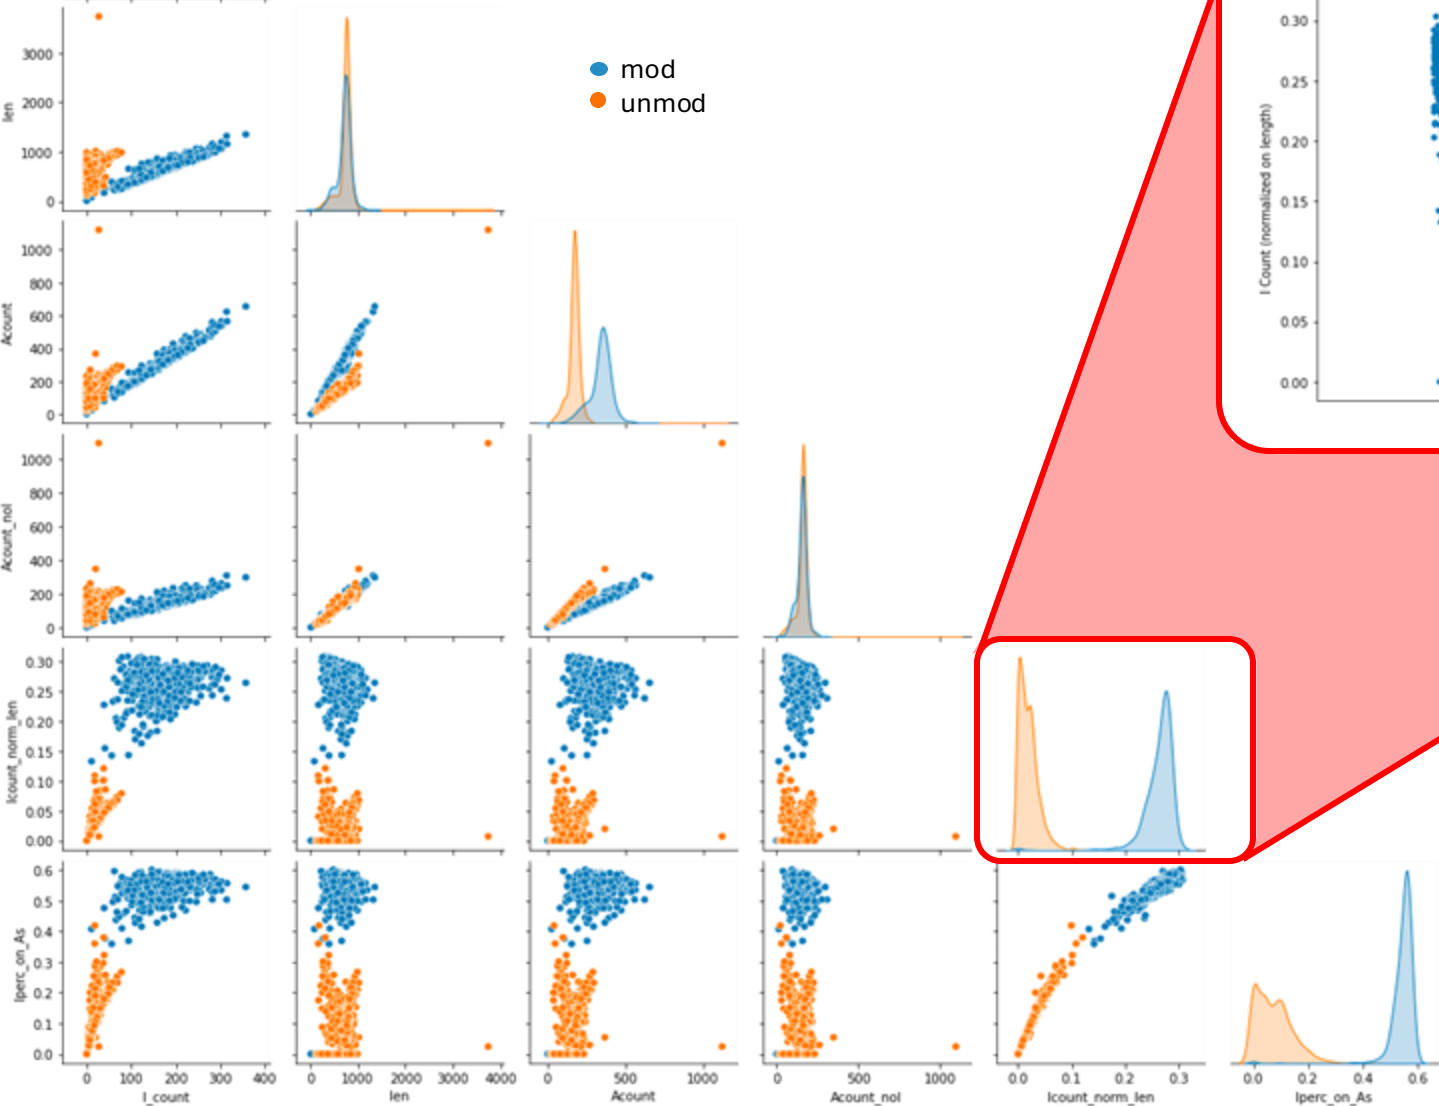

B

Inosine count from basecalled reads  
Synthetic Constructs coli-IVTs

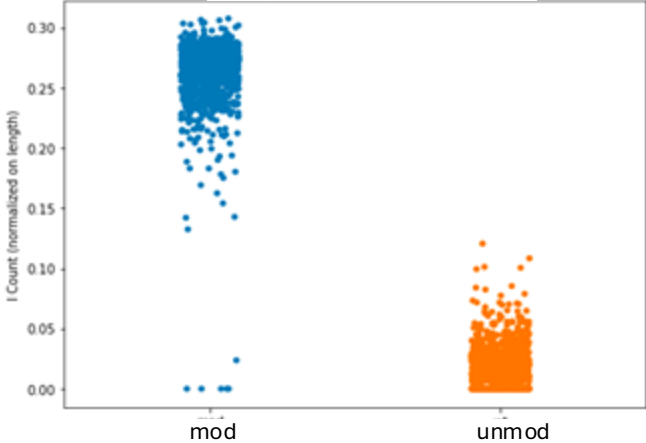

Supplementary Figure 7

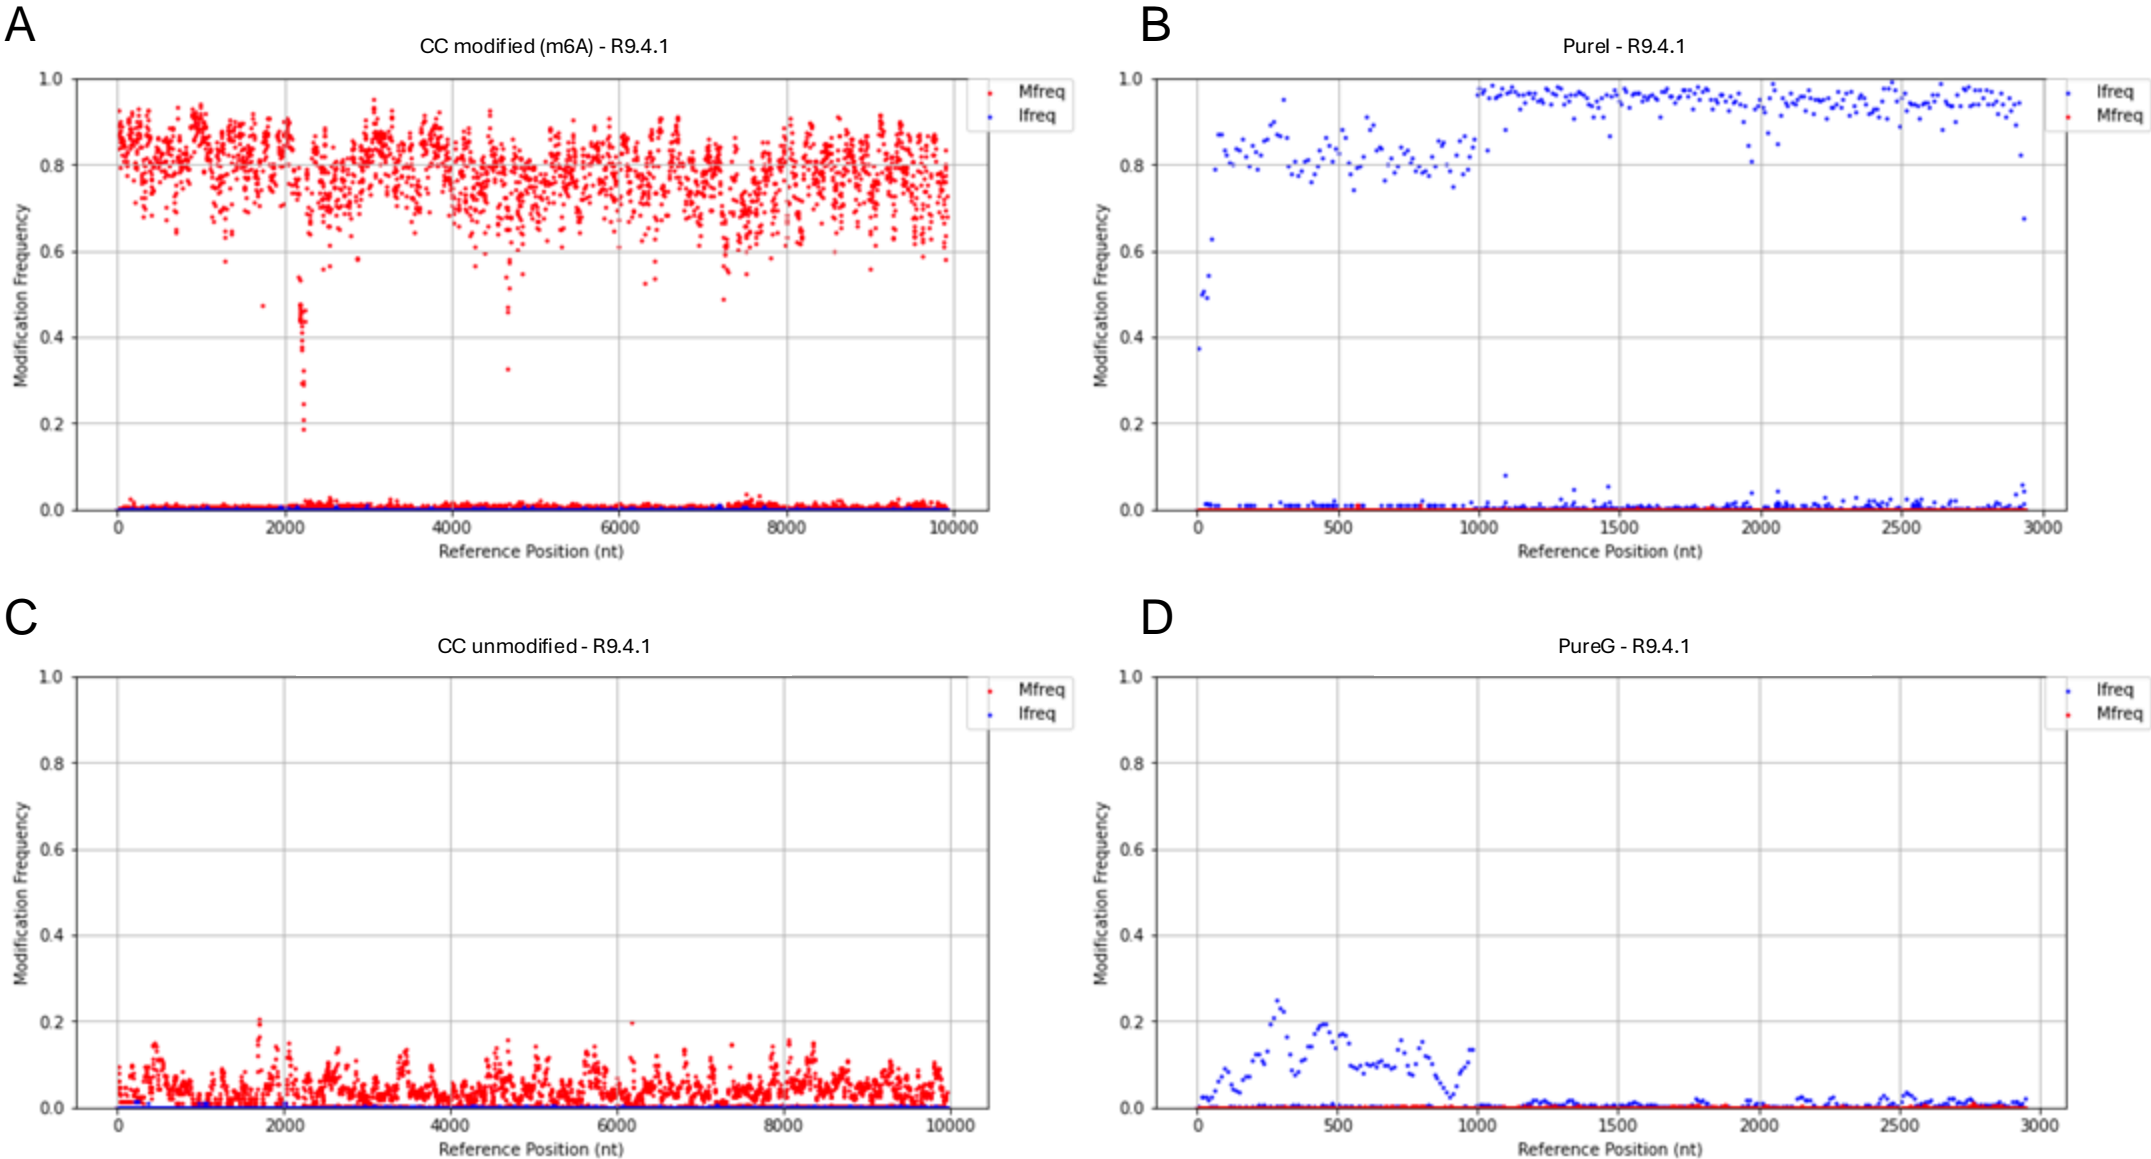

Supplementary Figure 8

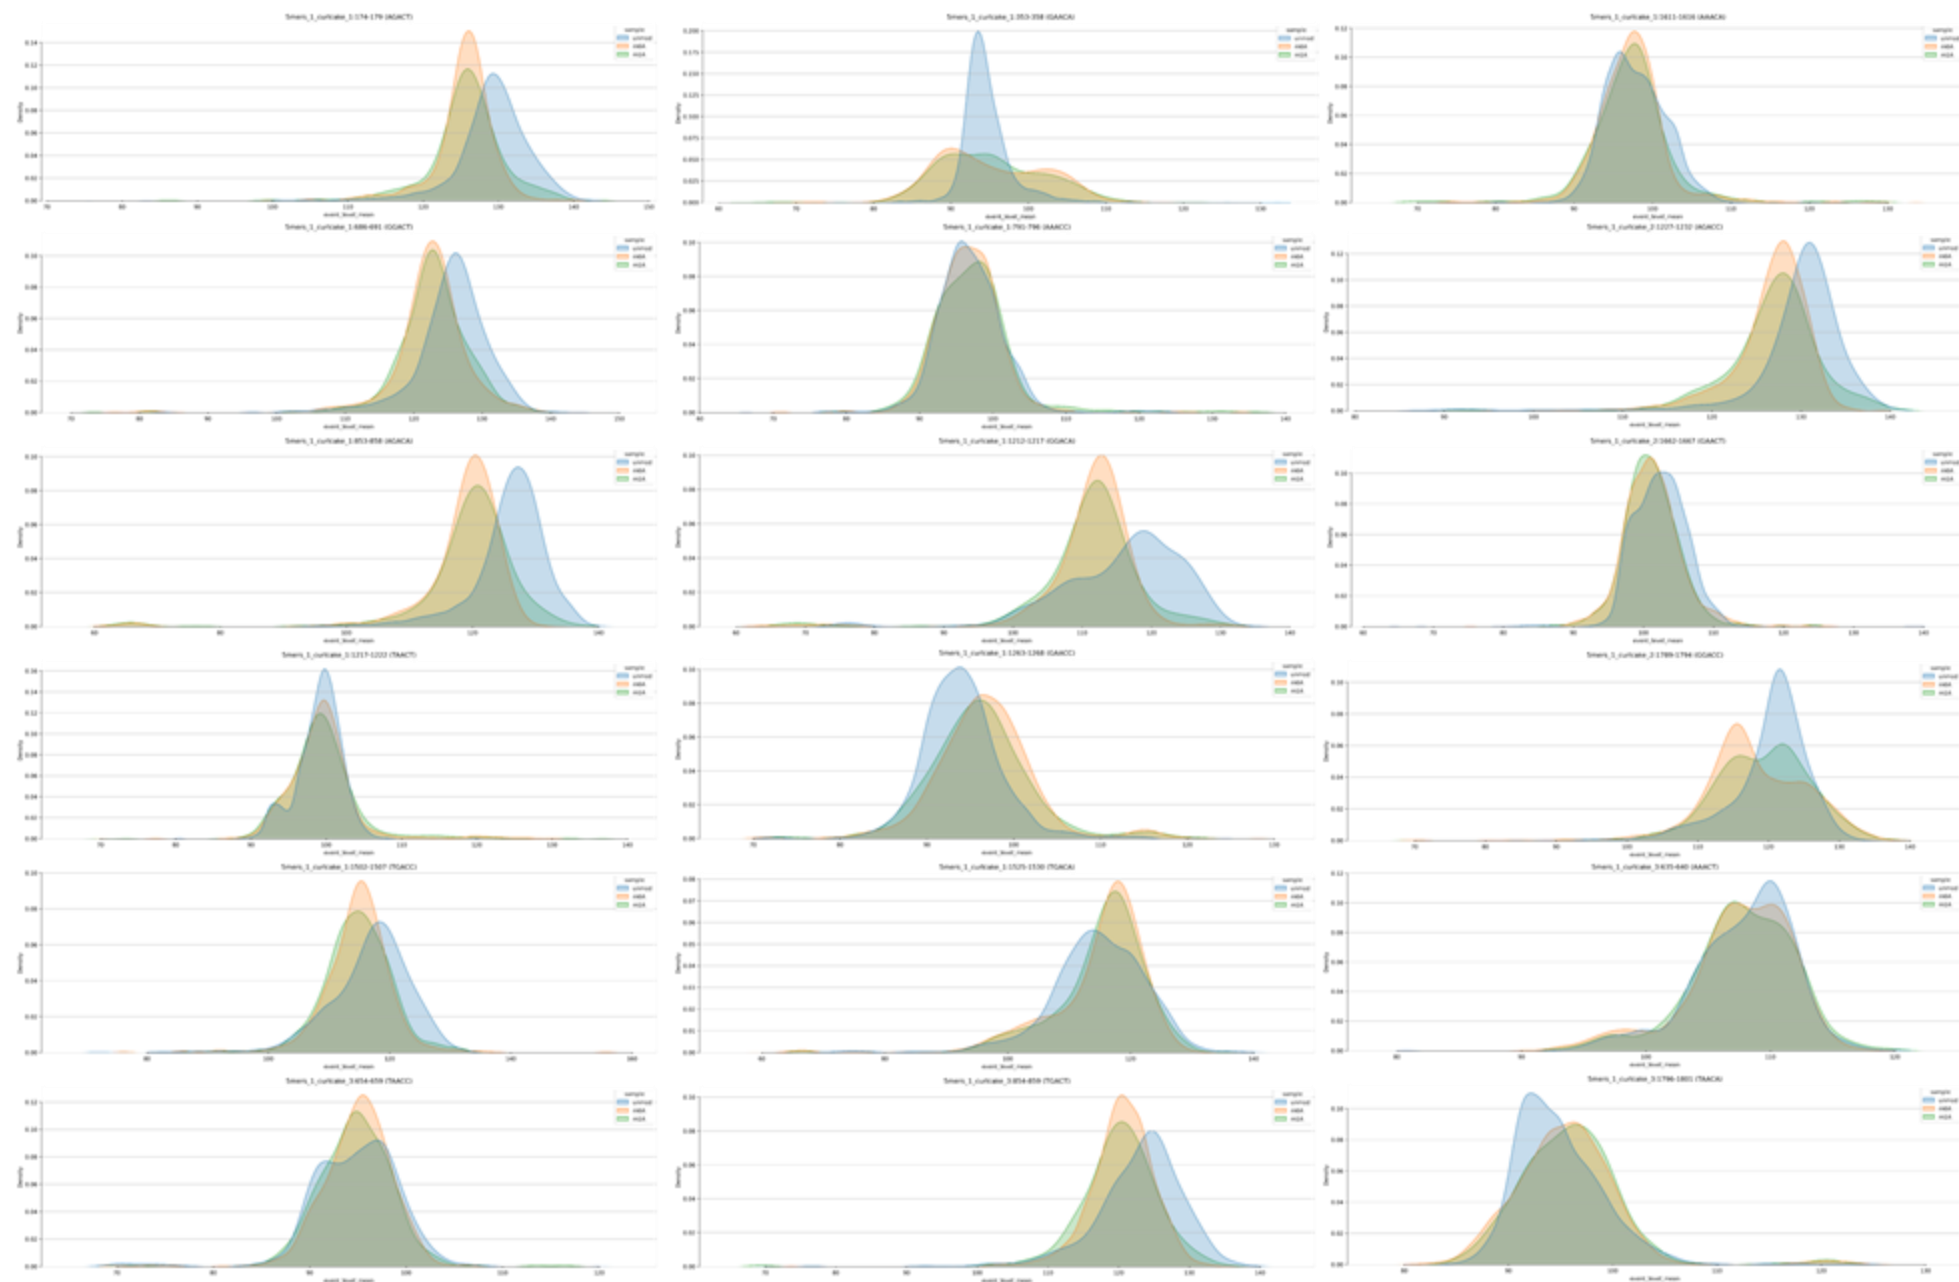

Supplementary Figure 9

| contig             | start | stop | kmer  | unmod_mean  | m6A_mean    | m1A_mean    | unmod_std   | m6A_std     | m1A_std     | unmod_N | m6A_N | m1A_N | unmod_vs_m6A_p | unmod_vs_m1A_p | m6A_vs_m1A_p |
|--------------------|-------|------|-------|-------------|-------------|-------------|-------------|-------------|-------------|---------|-------|-------|----------------|----------------|--------------|
| 5mers_1_curlcake_1 | 174   | 179  | AGACT | 129.3160096 | 125.4521572 | 125.7468703 | 4.842301883 | 3.936408679 | 5.108871509 | 4987    | 1539  | 802   | 3.41E-254      | 5.69E-109      | 0.141139944  |
| 5mers_1_curlcake_1 | 353   | 358  | GAACA | 94.56351801 | 95.13601852 | 95.19900433 | 3.091411901 | 6.796281227 | 6.734308996 | 4693    | 1404  | 693   | 0.190994377    | 0.475968127    | 0.627357182  |
| 5mers_1_curlcake_1 | 686   | 691  | GGACT | 125.662737  | 122.533716  | 122.99695   | 5.287202687 | 5.5678547   | 5.182279596 | 7932    | 2979  | 1341  | 3.24E-241      | 3.60E-101      | 0.039886435  |
| 5mers_1_curlcake_1 | 791   | 796  | AAACC | 96.93390074 | 96.66319843 | 97.18749035 | 4.448026568 | 4.248481202 | 5.482185278 | 4030    | 1779  | 777   | 0.074847252    | 0.891635704    | 0.181896054  |
| 5mers_1_curlcake_1 | 853   | 858  | AGACA | 125.9631049 | 118.6015679 | 119.4769284 | 5.777571013 | 7.437109984 | 8.801781405 | 8844    | 3999  | 1732  | 0              | 0              | 1.41E-11     |
| 5mers_1_curlcake_1 | 1212  | 1217 | GGACA | 116.1320482 | 111.43486   | 111.2699292 | 8.577071838 | 6.501248794 | 7.661389773 | 4028    | 1214  | 565   | 2.04E-107      | 2.14E-53       | 0.307259305  |
| 5mers_1_curlcake_1 | 1217  | 1222 | TAACT | 99.06345587 | 99.30972041 | 99.43301943 | 2.967564179 | 4.537248584 | 4.95402042  | 6991    | 2611  | 1338  | 0.130256421    | 0.227508626    | 0.956786857  |
| 5mers_1_curlcake_1 | 1263  | 1268 | GAACC | 94.01860146 | 96.71914384 | 96.11230051 | 4.499890082 | 5.64735252  | 5.934968924 | 4376    | 3761  | 1178  | 1.99E-152      | 3.24E-39       | 3.11E-05     |
| 5mers_1_curlcake_1 | 1502  | 1507 | TGACC | 116.8889692 | 114.7054948 | 114.7512685 | 6.719624621 | 5.5864745   | 5.466713272 | 4152    | 1718  | 607   | 1.46E-57       | 1.56E-24       | 0.674218483  |
| 5mers_1_curlcake_1 | 1525  | 1530 | TGACA | 114.7106122 | 114.8937581 | 115.2754132 | 7.740102773 | 7.846028278 | 7.300890062 | 4067    | 4191  | 1428  | 7.91E-07       | 3.59E-05       | 0.845950311  |
| 5mers_1_curlcake_1 | 1611  | 1616 | AAACA | 97.86604754 | 97.18281369 | 97.30011923 | 3.790751619 | 4.274527451 | 5.301301106 | 4964    | 2630  | 671   | 1.29E-12       | 0.000932802    | 0.499572993  |
| 5mers_1_curlcake_2 | 1227  | 1232 | AGACC | 129.8810762 | 126.63275   | 127.0771746 | 5.724572409 | 4.293156257 | 4.979920284 | 5194    | 3360  | 899   | 0              | 4.67E-102      | 0.08435981   |
| 5mers_1_curlcake_2 | 1662  | 1667 | GAACT | 102.4463327 | 101.2824951 | 101.1797086 | 3.882664061 | 4.07053175  | 3.906544556 | 4322    | 3603  | 755   | 9.68E-51       | 2.61E-20       | 0.64310733   |
| 5mers_1_curlcake_2 | 1789  | 1794 | GGACC | 120.2448649 | 118.221537  | 119.1715504 | 5.462500994 | 7.079771543 | 6.640495069 | 6366    | 4242  | 903   | 3.36E-84       | 5.52E-09       | 1.08E-05     |
| 5mers_1_curlcake_3 | 635   | 640  | AAACT | 107.8301829 | 107.4942456 | 107.6829912 | 4.048101914 | 4.227820981 | 4.137106358 | 2733    | 2280  | 565   | 0.019579169    | 0.261909923    | 0.782250221  |
| 5mers_1_curlcake_3 | 654   | 659  | TAACC | 94.70363692 | 94.94123561 | 94.73068429 | 4.722900773 | 3.686237301 | 3.850658781 | 3239    | 2258  | 643   | 0.234496184    | 0.287300474    | 0.038187415  |
| 5mers_1_curlcake_3 | 854   | 859  | TGACT | 123.0103914 | 120.480202  | 120.1216729 | 6.172653075 | 4.455537619 | 5.644448033 | 2606    | 2921  | 807   | 5.27E-99       | 8.93E-47       | 0.101151864  |
| 5mers_1_curlcake_3 | 1796  | 1801 | TAACA | 94.85080637 | 95.52580708 | 95.88136433 | 4.161809658 | 5.046435668 | 4.993260206 | 5655    | 11269 | 1312  | 3.39E-29       | 7.41E-17       | 0.015057534  |

Supplementary Figure 10

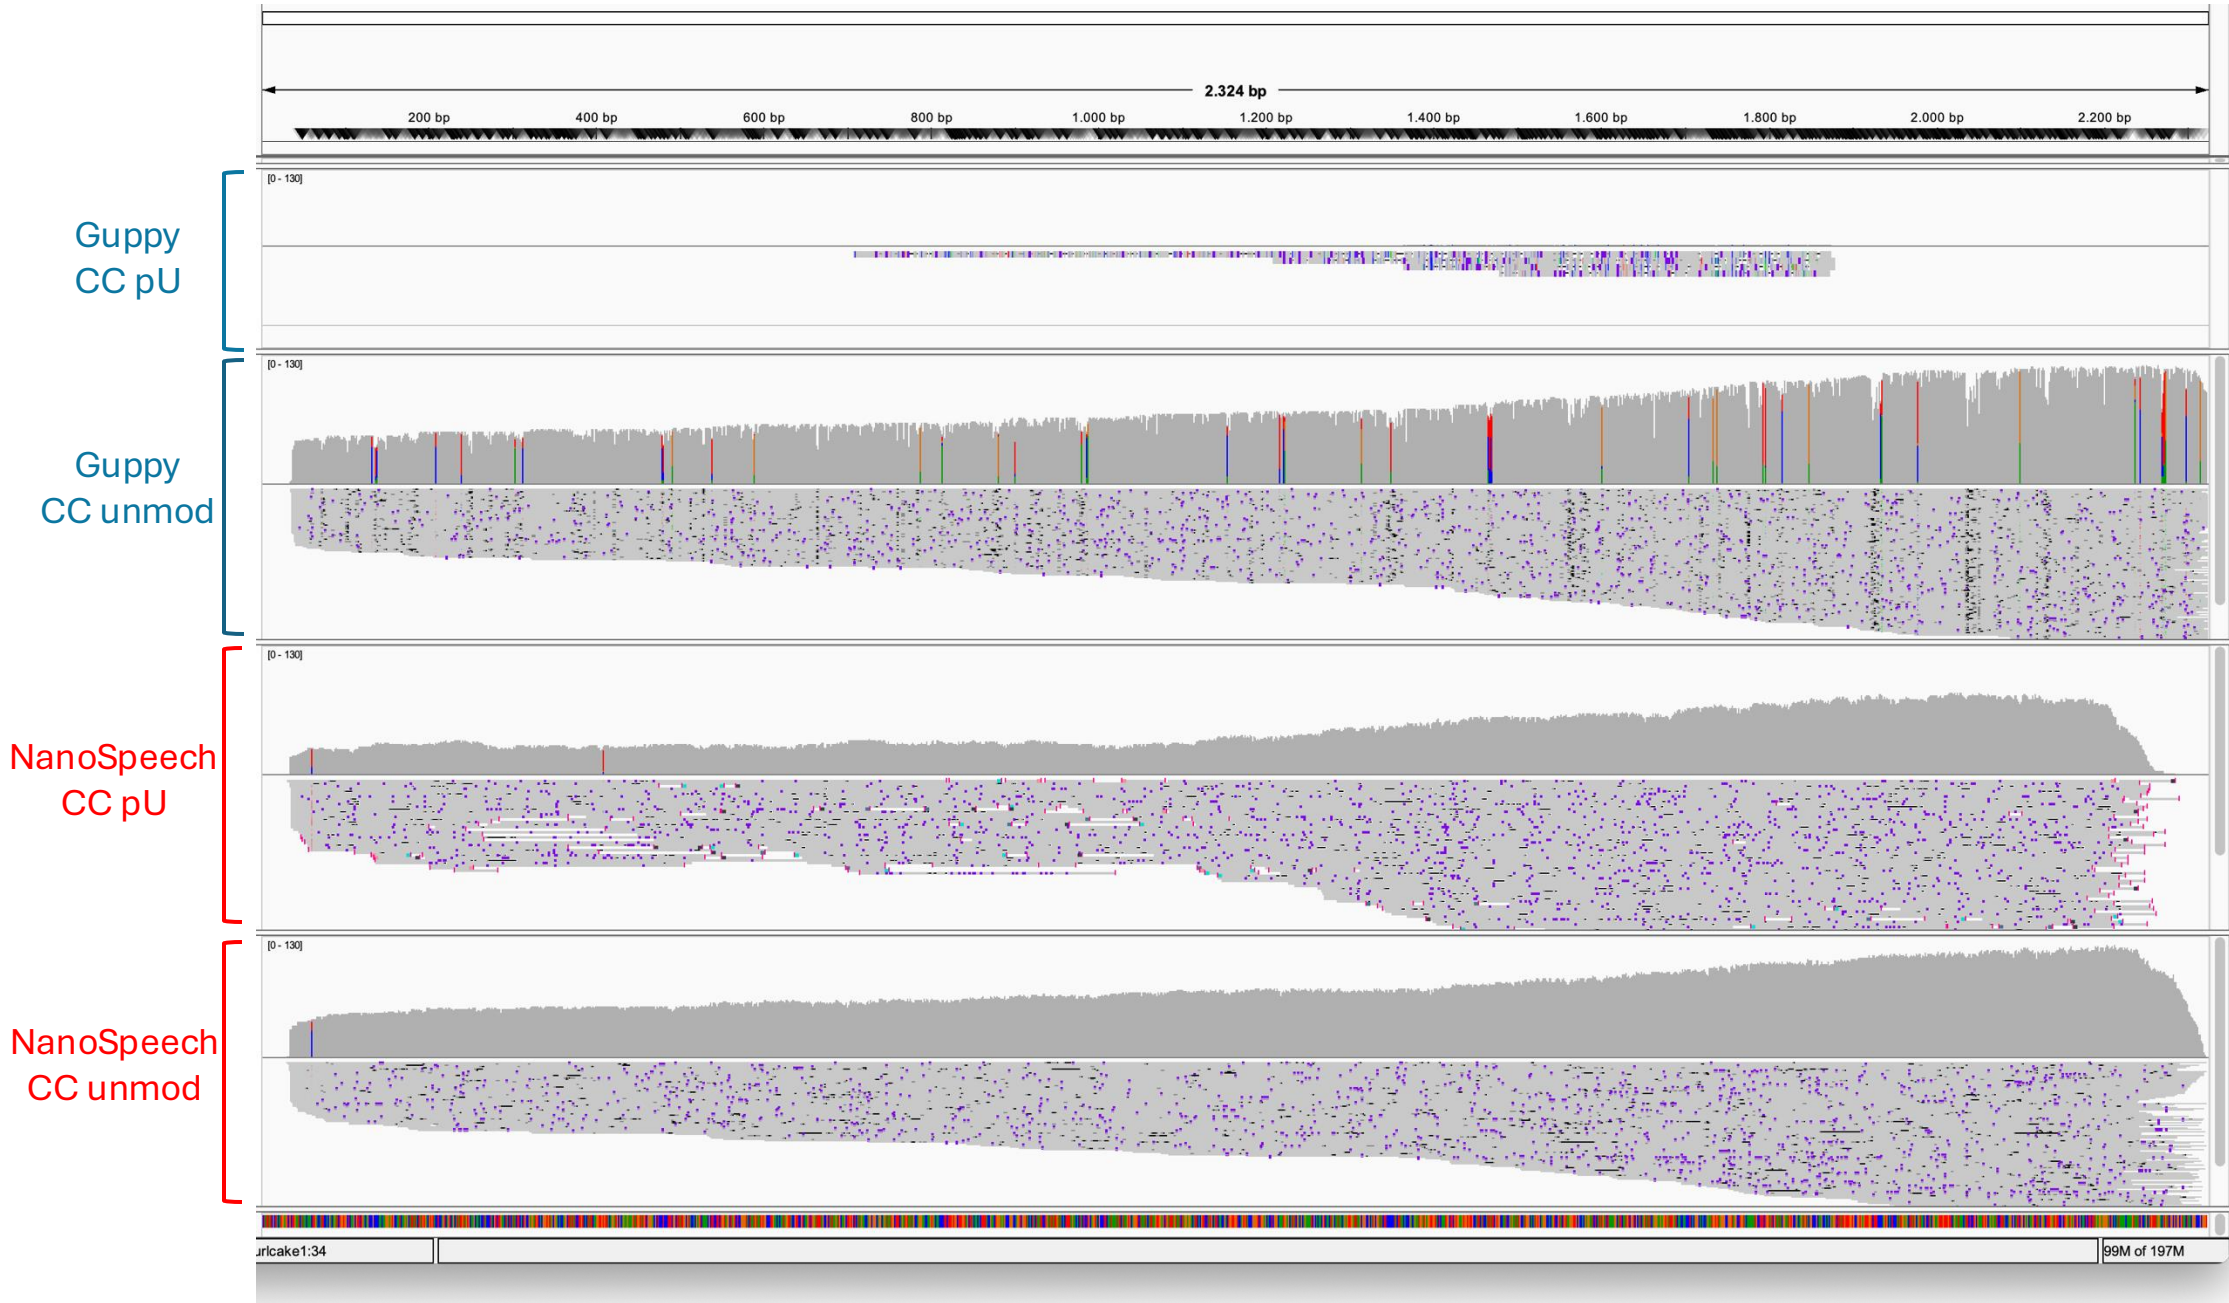

Supplementary Figure 11

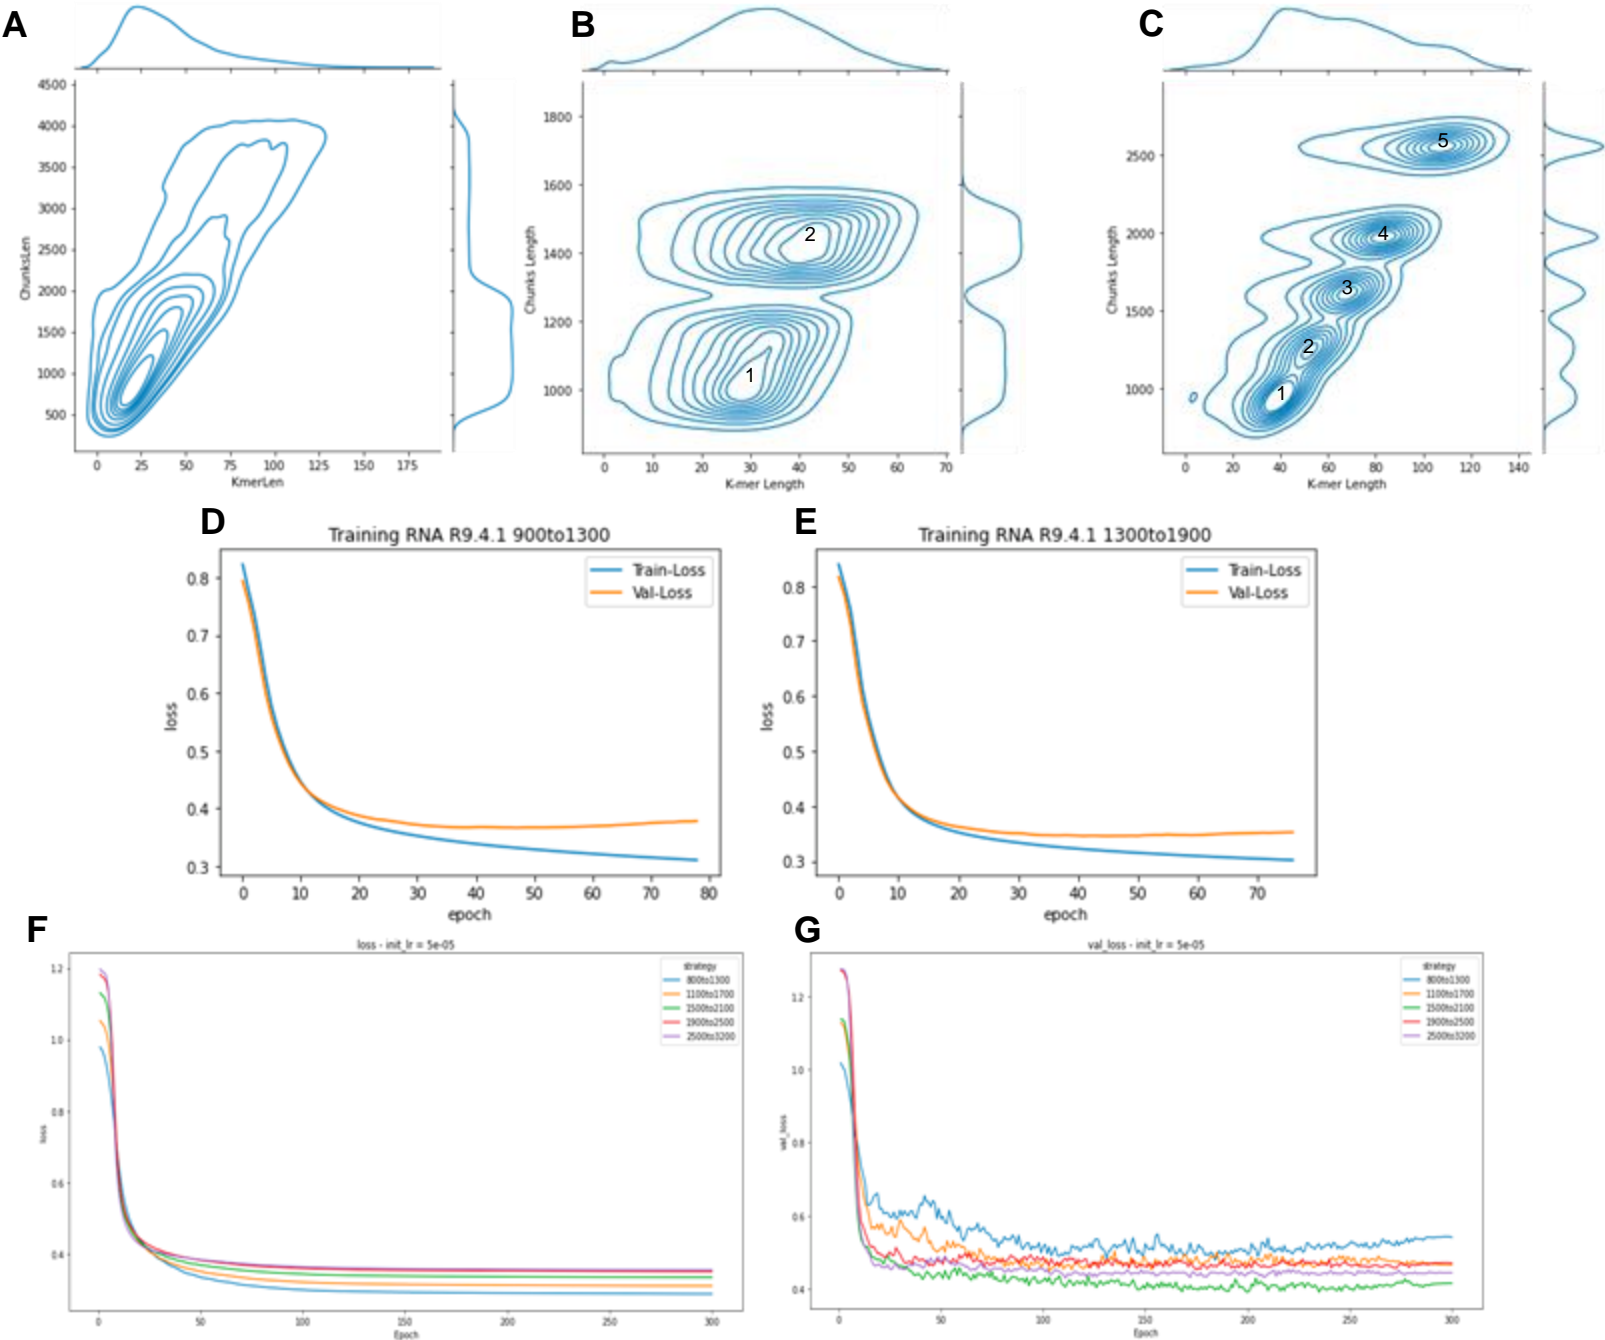

Supplement: Supplementary file 1 [file 2ac826cb429f78cddcc01c72.pdf]
